# Supplementary material for: Evolution of Interbacterial Antagonism in Bee Gut Microbiota Reflects Host and Symbiont Diversification
Source: PubMed Central journal article supplement (PMC8125069; doi:10.1128/msystems.00063-21), 2021-05-11
Supplement: mSystems.00063-21-st001.pdf [file mSystems.00063-21-st001.pdf]

**Table S1.** Conserved domains found in Rhs toxins from genomes of bee gut symbionts.

| Toxin domain | CDD top hit            | Accession | E-value  | Copies | Genus (full length)  | Genus (fragment)                                                | Rhs core domains         |
|--------------|------------------------|-----------|----------|--------|----------------------|-----------------------------------------------------------------|--------------------------|
| Rhs_tox_001  |                        |           |          | 3      | <i>Apibacter</i>     | <i>Apibacter</i>                                                | Rhs_core_12              |
| Rhs_tox_002  |                        |           |          | 1      |                      | <i>Snodgrassella</i>                                            |                          |
| Rhs_tox_003  |                        |           |          | 1      |                      | <i>Apibacter</i>                                                |                          |
| Rhs_tox_004  | DUF2778                | pfam10908 | 2.91E-09 | 1      |                      | <i>Apibacter</i>                                                |                          |
| Rhs_tox_005  |                        |           |          | 1      |                      | <i>Apibacter</i>                                                | Rhs_core_2               |
| Rhs_tox_006  |                        |           |          | 1      |                      | <i>Apibacter</i>                                                |                          |
| Rhs_tox_007  |                        |           |          | 1      |                      | <i>Apibacter</i>                                                |                          |
| Rhs_tox_008  |                        |           |          | 6      |                      | Multiple                                                        |                          |
| Rhs_tox_009  | DUF4258                | pfam14076 | 0.00014  | 2      |                      | <i>Apibacter</i>                                                |                          |
| Rhs_tox_010  |                        |           |          | 1      |                      | <i>Apibacter</i>                                                |                          |
| Rhs_tox_011  |                        |           |          | 1      |                      | <i>Apibacter</i>                                                |                          |
| Rhs_tox_012  |                        |           |          | 5      | <i>Apibacter</i>     | <i>Apibacter</i>                                                | Rhs_core_1               |
| Rhs_tox_013  |                        |           |          | 1      |                      | <i>Apibacter</i>                                                |                          |
| Rhs_tox_014  |                        |           |          | 1      |                      | <i>Apibacter</i>                                                |                          |
| Rhs_tox_015  | ZnMc_serralysin_like   | cd04277   | 8.13E-06 | 3      |                      | <i>Apibacter</i>                                                |                          |
| Rhs_tox_016  |                        |           |          | 1      |                      | <i>Apibacter</i>                                                |                          |
| Rhs_tox_017  |                        |           |          | 2      |                      | <i>Apibacter</i>                                                |                          |
| Rhs_tox_018  |                        |           |          | 1      |                      | <i>Apibacter</i>                                                |                          |
| Rhs_tox_019  |                        |           |          | 2      |                      | <i>Apibacter</i>                                                |                          |
| Rhs_tox_020  |                        |           |          | 8      | <i>G. apis</i>       |                                                                 | Rhs_core_3               |
| Rhs_tox_021  | Ntox47                 | pfam15540 | 9.67E-19 | 2      |                      | <i>Apibacter</i>                                                |                          |
| Rhs_tox_022  | Endonuclea_NS_2        | pfam13930 | 8.41E-07 | 14     |                      | <i>Snodgrassella</i><br><i>Gilliamella</i><br><i>Frischella</i> | Rhs_core_5<br>Rhs_core_9 |
| Rhs_tox_023  |                        |           |          | 1      |                      | <i>Gilliamella</i>                                              |                          |
| Rhs_tox_024  |                        |           |          | 1      |                      | <i>Gilliamella</i>                                              |                          |
| Rhs_tox_025  |                        |           |          | 2      |                      | <i>Gilliamella</i>                                              |                          |
| Rhs_tox_026  |                        |           |          | 8      | <i>G. apis</i>       |                                                                 | Rhs_core_4               |
| Rhs_tox_027  |                        |           |          | 14     |                      | <i>Snodgrassella</i><br><i>Gilliamella</i>                      | Rhs_core_5<br>Rhs_core_6 |
| Rhs_tox_028  | ParE_toxin superfamily | cl21503   | 0.001185 | 7      | <i>Snodgrassella</i> | <i>Snodgrassella</i><br><i>Gilliamella</i>                      | Rhs_core_6               |
| Rhs_tox_029  | GIY-YIG_UPF0213        | cd10456   | 0.007695 | 14     |                      | <i>Snodgrassella</i><br><i>Gilliamella</i>                      |                          |
| Rhs_tox_030  |                        |           |          | 7      |                      | <i>Snodgrassella</i><br><i>Gilliamella</i><br><i>Apibacter</i>  |                          |
| Rhs_tox_031  |                        |           |          | 12     |                      | <i>Snodgrassella</i>                                            | Rhs_core_6               |
| Rhs_tox_032  |                        |           |          | 2      |                      | <i>Snodgrassella</i>                                            |                          |
| Rhs_tox_033  |                        |           |          | 7      |                      | <i>Snodgrassella</i>                                            |                          |
| Rhs_tox_034  | Tox-ART-HYD1           | pfam15633 | 4.09E-10 | 7      | <i>Snodgrassella</i> | <i>Snodgrassella</i>                                            | Rhs_core_6               |
| Rhs_tox_035  |                        |           |          | 1      |                      | <i>Snodgrassella</i>                                            |                          |

**Table S1 continued**

| Toxin domain | CDD top hit     | Accession | E-value  | Copies | Genus (full length)  | Genus (fragment)                                                | Rhs core domains |
|--------------|-----------------|-----------|----------|--------|----------------------|-----------------------------------------------------------------|------------------|
| Rhs_tox_036  |                 |           |          | 2      |                      | <i>Snodgrassella</i><br><i>Gilliamella</i>                      | Rhs_core_6       |
| Rhs_tox_037  | Colicin-DNase   | pfam12639 | 7.25E-13 | 4      |                      | <i>Snodgrassella</i><br><i>Gilliamella</i>                      |                  |
| Rhs_tox_038  |                 |           |          | 27     |                      | <i>Snodgrassella</i><br><i>Gilliamella</i>                      |                  |
| Rhs_tox_039  | RHS_repeat      | pfam05593 | 0.006908 | 1      |                      | <i>Snodgrassella</i>                                            | Rhs_core_6       |
| Rhs_tox_040  |                 |           |          | 2      | <i>Frischella</i>    | <i>Frischella</i>                                               | Rhs_core_5       |
| Rhs_tox_041  |                 |           |          | 19     |                      | <i>Snodgrassella</i><br><i>Gilliamella</i>                      | Rhs_core_6       |
| Rhs_tox_042  |                 |           |          | 10     |                      | <i>Snodgrassella</i>                                            |                  |
| Rhs_tox_043  | GH-E            | pfam14410 | 0.000944 | 17     |                      | <i>Snodgrassella</i><br><i>Gilliamella</i><br><i>Frischella</i> |                  |
| Rhs_tox_044  | Ntox30          | pfam15532 | 4.61E-05 | 25     |                      | <i>Snodgrassella</i><br><i>Gilliamella</i>                      |                  |
| Rhs_tox_045  |                 |           |          | 2      | <i>Snodgrassella</i> | <i>Snodgrassella</i>                                            | Rhs_core_6       |
| Rhs_tox_046  |                 |           |          | 19     |                      | <i>Snodgrassella</i><br><i>Gilliamella</i>                      | Rhs_core_6       |
| Rhs_tox_047  | Colicin-DNase   | pfam12639 | 4.11E-06 | 15     | <i>Snodgrassella</i> | <i>Snodgrassella</i><br><i>Gilliamella</i>                      | Rhs_core_6       |
| Rhs_tox_048  |                 |           |          | 9      |                      | <i>Snodgrassella</i>                                            | Rhs_core_6       |
| Rhs_tox_049  |                 |           |          | 13     |                      | <i>Snodgrassella</i><br><i>Gilliamella</i>                      | Rhs_core_6       |
| Rhs_tox_050  |                 |           |          | 17     |                      | <i>Snodgrassella</i>                                            | Rhs_core_6       |
| Rhs_tox_051  |                 |           |          | 7      | <i>Snodgrassella</i> | <i>Snodgrassella</i><br><i>Gilliamella</i>                      | Rhs_core_6       |
| Rhs_tox_052  | HNHc            | cd00085   | 0.0002   | 1      |                      | <i>Snodgrassella</i>                                            | Rhs_core_6       |
| Rhs_tox_053  |                 |           |          | 1      |                      | <i>Snodgrassella</i>                                            | Rhs_core_6       |
| Rhs_tox_054  |                 |           |          | 1      |                      | <i>Gilliamella</i>                                              |                  |
| Rhs_tox_055  | LHH             | pfam14411 | 1.97E-36 | 5      |                      | <i>Snodgrassella</i>                                            |                  |
| Rhs_tox_056  |                 |           |          | 3      |                      | <i>Snodgrassella</i>                                            | Rhs_core_6       |
| Rhs_tox_057  | Tox-HNH-EHHH    | pfam15657 | 1.10E-06 | 13     | <i>Snodgrassella</i> | <i>Snodgrassella</i><br><i>Gilliamella</i>                      | Rhs_core_6       |
| Rhs_tox_058  |                 |           |          | 11     | <i>Snodgrassella</i> | <i>Snodgrassella</i>                                            | Rhs_core_6       |
| Rhs_tox_059  | Tox-ART-HYD1    | pfam15633 | 2.35E-07 | 14     |                      | <i>Snodgrassella</i><br><i>Gilliamella</i>                      | Rhs_core_6       |
| Rhs_tox_060  | DNase_NucA_NucB | pfam14040 | 1.21E-11 | 6      |                      | <i>Snodgrassella</i>                                            |                  |
| Rhs_tox_061  |                 |           |          | 21     |                      | <i>Snodgrassella</i><br><i>Gilliamella</i>                      | Rhs_core_6       |
| Rhs_tox_062  |                 |           |          | 12     |                      | <i>Snodgrassella</i>                                            | Rhs_core_6       |
| Rhs_tox_063  | Tox-GHH         | pfam15636 | 1.36E-12 | 4      |                      | <i>Snodgrassella</i><br><i>Gilliamella</i>                      |                  |
| Rhs_tox_064  |                 |           |          | 7      |                      | <i>Snodgrassella</i>                                            |                  |
| Rhs_tox_065  | CdiA-CT_Ec-like | cd20692   | 3.31E-06 | 11     |                      | <i>Snodgrassella</i>                                            |                  |
| Rhs_tox_066  | ADPRTs_Tse2     | pfam18648 | 6.61E-05 | 4      |                      | <i>Snodgrassella</i>                                            |                  |

**Table S1 continued**

| <b>Toxin domain</b> | <b>CDD top hit</b> | <b>Accession</b> | <b>E-value</b> | <b>Copies</b> | <b>Genus (full length)</b> | <b>Genus (fragment)</b>          | <b>Rhs core domains</b> |
|---------------------|--------------------|------------------|----------------|---------------|----------------------------|----------------------------------|-------------------------|
| Rhs_tox_067         |                    |                  |                | 7             | <i>Snodgrassella</i>       | <i>Snodgrassella</i>             | Rhs_core_6              |
| Rhs_tox_068         |                    |                  |                | 2             |                            | <i>Snodgrassella</i>             |                         |
| Rhs_tox_069         |                    |                  |                | 3             |                            | <i>Snodgrassella</i>             |                         |
| Rhs_tox_070         |                    |                  |                | 9             | <i>Snodgrassella</i>       | <i>Snodgrassella</i>             | Rhs_core_6              |
| Rhs_tox_071         |                    |                  |                | 20            | <i>Snodgrassella</i>       | <i>Snodgrassella Gilliamella</i> | Rhs_core_6              |
| Rhs_tox_072         |                    |                  |                | 26            | <i>Snodgrassella</i>       | <i>Snodgrassella Gilliamella</i> | Rhs_core_6              |
| Rhs_tox_073         |                    |                  |                | 9             | <i>Snodgrassella</i>       | <i>Snodgrassella</i>             | Rhs_core_6              |
| Rhs_tox_074         |                    |                  |                | 12            |                            | <i>Snodgrassella Gilliamella</i> | Rhs_core_6              |
| Rhs_tox_075         |                    |                  |                | 5             |                            | <i>Snodgrassella</i>             |                         |
| Rhs_tox_076         |                    |                  |                | 4             |                            | <i>Snodgrassella</i>             |                         |
| Rhs_tox_077         | DUF4329            | pfam14220        | 3.96E-13       | 10            |                            | <i>Snodgrassella Gilliamella</i> | Rhs_core_6              |
| Rhs_tox_078         | Tox-SHH            | pfam15652        | 1.32E-35       | 7             |                            | <i>Snodgrassella Gilliamella</i> |                         |
| Rhs_tox_079         | WHH                | pfam14414        | 2.69E-12       | 4             |                            | <i>Snodgrassella</i>             |                         |
| Rhs_tox_080         |                    |                  |                | 14            |                            | <i>Snodgrassella Gilliamella</i> |                         |
| Rhs_tox_081         |                    |                  |                | 5             |                            | <i>Snodgrassella</i>             |                         |
| Rhs_tox_082         |                    |                  |                | 9             |                            | <i>Snodgrassella</i>             |                         |
| Rhs_tox_083         |                    |                  |                | 2             |                            | <i>Snodgrassella</i>             |                         |
| Rhs_tox_084         |                    |                  |                | 1             |                            | <i>Gilliamella</i>               |                         |
| Rhs_tox_085         | Ntox50             | pfam15542        | 0.002308       | 2             |                            | <i>Snodgrassella</i>             |                         |
| Rhs_tox_086         |                    |                  |                | 21            |                            | <i>Snodgrassella Gilliamella</i> | Rhs_core_10             |
| Rhs_tox_087         |                    |                  |                | 3             |                            | <i>Snodgrassella</i>             | Rhs_core_6              |
| Rhs_tox_088         |                    |                  |                | 4             | <i>Snodgrassella</i>       | <i>Snodgrassella Gilliamella</i> | Rhs_core_6              |
| Rhs_tox_089         |                    |                  |                | 4             | <i>Snodgrassella</i>       | <i>Snodgrassella</i>             | Rhs_core_6              |
| Rhs_tox_090         |                    |                  |                | 25            |                            | <i>Snodgrassella Gilliamella</i> | Rhs_core_6              |
| Rhs_tox_091         |                    |                  |                | 7             | <i>Snodgrassella</i>       | <i>Snodgrassella</i>             | Rhs_core_6              |
| Rhs_tox_092         |                    |                  |                | 16            | <i>Snodgrassella</i>       | <i>Snodgrassella Gilliamella</i> | Rhs_core_6              |
| Rhs_tox_093         | OmpR               | COG0745          | 0.005106       | 10            | <i>Snodgrassella</i>       | <i>Snodgrassella Gilliamella</i> | Rhs_core_6              |
| Rhs_tox_094         | Ntox8              | pfam15545        | 9.39E-10       | 10            | <i>Snodgrassella</i>       | <i>Snodgrassella Gilliamella</i> | Rhs_core_6              |
| Rhs_tox_095         | Pput2613-deam      | pfam14427        | 2.73E-54       | 2             |                            | <i>Snodgrassella</i>             |                         |
| Rhs_tox_096         | AHH                | pfam14412        | 6.75E-06       | 3             |                            | <i>Gilliamella</i>               | Rhs_core_6              |
| Rhs_tox_097         |                    |                  |                | 22            |                            | <i>Snodgrassella Gilliamella</i> | Rhs_core_6              |
| Rhs_tox_098         |                    |                  |                | 6             |                            | <i>Snodgrassella Gilliamella</i> |                         |

**Table S1 continued**

| <b>Toxin domain</b> | <b>CDD top hit</b> | <b>Accession</b> | <b>E-value</b> | <b>Copies</b> | <b>Genus (full length)</b> | <b>Genus (fragment)</b>                    | <b>Rhs core domains</b> |
|---------------------|--------------------|------------------|----------------|---------------|----------------------------|--------------------------------------------|-------------------------|
| Rhs_tox_099         | Toxin-deaminase    | pfam14424        | 2.80E-18       | 5             |                            | <i>Snodgrassella</i>                       |                         |
| Rhs_tox_100         | WHH                | pfam14414        | 8.25E-15       | 4             |                            | <i>Snodgrassella</i>                       | Rhs_core_6              |
| Rhs_tox_101         | Colicin-DNase      | pfam12639        | 1.81E-11       | 6             | <i>Snodgrassella</i>       | <i>Snodgrassella</i><br><i>Gilliamella</i> | Rhs_core_6              |
| Rhs_tox_102         |                    |                  |                | 23            |                            | <i>Snodgrassella</i><br><i>Gilliamella</i> |                         |
| Rhs_tox_103         | Tox-HNH-HHH        | pfam15637        | 1.36E-05       | 3             |                            | <i>Snodgrassella</i>                       |                         |
| Rhs_tox_104         | LHH                | pfam14411        | 0.000668       | 4             |                            | <i>Snodgrassella</i><br><i>Gilliamella</i> |                         |
| Rhs_tox_105         |                    |                  |                | 4             |                            | <i>Snodgrassella</i><br><i>Gilliamella</i> |                         |
| Rhs_tox_106         |                    |                  |                | 14            | <i>Snodgrassella</i>       | <i>Snodgrassella</i>                       | Rhs_core_6              |
| Rhs_tox_107         |                    |                  |                | 61            |                            | <i>Snodgrassella</i><br><i>Gilliamella</i> | Rhs_core_6              |
| Rhs_tox_108         |                    |                  |                | 3             |                            | <i>Snodgrassella</i>                       |                         |
| Rhs_tox_109         | Tox-REase-3        | pfam15647        | 2.01E-31       | 6             |                            | <i>Gilliamella</i>                         |                         |
| Rhs_tox_110         | AHH                | pfam14412        | 1.43E-16       | 17            | <i>Snodgrassella</i>       | <i>Snodgrassella</i><br><i>Gilliamella</i> | Rhs_core_6              |
| Rhs_tox_111         |                    |                  |                | 1             |                            | <i>Gilliamella</i>                         |                         |
| Rhs_tox_112         |                    |                  |                | 7             | <i>Snodgrassella</i>       | <i>Snodgrassella</i>                       | Rhs_core_6              |
| Rhs_tox_113         | AHH                | pfam14412        | 1.31E-13       | 11            | <i>Snodgrassella</i>       | <i>Snodgrassella</i>                       | Rhs_core_6              |
| Rhs_tox_114         | CdiA-CT_Ec-like    | cd20692          | 3.18E-35       | 2             |                            | <i>Gilliamella</i>                         | Rhs_core_4              |
| Rhs_tox_115         |                    |                  |                | 3             |                            | <i>Snodgrassella</i>                       |                         |
| Rhs_tox_116         |                    |                  |                | 4             |                            | <i>Snodgrassella</i>                       |                         |
| Rhs_tox_117         |                    |                  |                | 1             |                            | <i>Gilliamella</i>                         |                         |
| Rhs_tox_118         | CdiA-CT_Kp342-like | cd20724          | 2.27E-59       | 17            | <i>Gilliamella</i>         | <i>Snodgrassella</i><br><i>Gilliamella</i> | Rhs_core_7              |
| Rhs_tox_119         | Colicin-DNase      | pfam12639        | 2.45E-20       | 12            | <i>Gilliamella</i>         | <i>Gilliamella</i>                         | Rhs_core_7              |
| Rhs_tox_120         |                    |                  |                | 3             |                            | <i>Gilliamella</i>                         |                         |
| Rhs_tox_121         |                    |                  |                | 1             |                            | <i>Gilliamella</i>                         |                         |
| Rhs_tox_122         |                    |                  |                | 4             |                            | <i>Gilliamella</i>                         |                         |
| Rhs_tox_123         |                    |                  |                | 1             |                            | <i>Gilliamella</i>                         |                         |
| Rhs_tox_124         |                    |                  |                | 5             | <i>Frischella</i>          | <i>Gilliamella</i>                         | Rhs_core_7              |
| Rhs_tox_125         | CdiA-CT_Ec-like    | cd20686          | 9.56E-32       | 16            |                            | <i>Gilliamella</i><br><i>Frischella</i>    |                         |
| Rhs_tox_126         |                    |                  |                | 1             |                            | <i>Gilliamella</i>                         |                         |
| Rhs_tox_127         |                    |                  |                | 4             |                            | <i>Gilliamella</i>                         |                         |
| Rhs_tox_128         |                    |                  |                | 2             |                            | <i>Gilliamella</i>                         |                         |
| Rhs_tox_129         | Peptidase_C39      | pfam03412        | 2.28E-11       | 3             | <i>Gilliamella</i>         | <i>Gilliamella</i>                         | Rhs_core_7              |
| Rhs_tox_130         |                    |                  |                | 8             | <i>Gilliamella</i>         | <i>Gilliamella</i>                         | Rhs_core_7              |
| Rhs_tox_131         |                    |                  |                | 5             |                            | <i>Snodgrassella</i><br><i>Gilliamella</i> |                         |
| Rhs_tox_132         |                    |                  |                | 8             | <i>Gilliamella</i>         | <i>Gilliamella</i>                         | Rhs_core_7              |
| Rhs_tox_133         |                    |                  |                | 5             |                            | <i>Gilliamella</i>                         |                         |

**Table S1 continued**

| <b>Toxin domain</b> | <b>CDD top hit</b> | <b>Accession</b> | <b>E-value</b> | <b>Copies</b> | <b>Genus (full length)</b>              | <b>Genus (fragment)</b>                                         | <b>Rhs core domains</b>  |
|---------------------|--------------------|------------------|----------------|---------------|-----------------------------------------|-----------------------------------------------------------------|--------------------------|
| Rhs_tox_134         |                    |                  |                | 3             |                                         | <i>Gilliamella</i>                                              |                          |
| Rhs_tox_135         | EndoU_bacteria     | pfam14436        | 7.53E-09       | 6             |                                         | <i>Snodgrassella</i><br><i>Gilliamella</i>                      |                          |
| Rhs_tox_136         |                    |                  |                | 1             |                                         | <i>Gilliamella</i>                                              |                          |
| Rhs_tox_137         | DUF596             | pfam04591        | 4.02E-13       | 18            | <i>Gilliamella</i>                      | <i>Gilliamella</i><br><i>Frischella</i>                         | Rhs_core_7               |
| Rhs_tox_138         |                    |                  |                | 1             |                                         | <i>Gilliamella</i>                                              |                          |
| Rhs_tox_139         | toxin-ParB         | cd16392          | 7.81E-26       | 19            | <i>Gilliamella</i>                      | <i>Gilliamella</i>                                              | Rhs_core_7               |
| Rhs_tox_140         |                    |                  |                | 6             |                                         | <i>Gilliamella</i>                                              |                          |
| Rhs_tox_141         |                    |                  |                | 1             |                                         | <i>Gilliamella</i>                                              |                          |
| Rhs_tox_142         |                    |                  |                | 3             |                                         | <i>Gilliamella</i>                                              |                          |
| Rhs_tox_143         | CdiA-CT_Ec-like    | cd20686          | 3.21E-51       | 17            |                                         | <i>Snodgrassella</i><br><i>Gilliamella</i>                      |                          |
| Rhs_tox_144         | EndoU_bacteria     | pfam14436        | 0.000303       | 13            |                                         | <i>Snodgrassella</i><br><i>Gilliamella</i>                      |                          |
| Rhs_tox_145         |                    |                  |                | 2             |                                         | <i>Apibacter</i>                                                |                          |
| Rhs_tox_146         |                    |                  |                | 4             | <i>Gilliamella</i>                      | <i>Gilliamella</i>                                              | Rhs_core_8               |
| Rhs_tox_147         |                    |                  |                | 2             | <i>Gilliamella</i><br><i>Frischella</i> |                                                                 | Rhs_core_8               |
| Rhs_tox_148         |                    |                  |                | 6             | <i>Gilliamella</i>                      | <i>Gilliamella</i>                                              | Rhs_core_8               |
| Rhs_tox_149         |                    |                  |                | 6             | <i>Snodgrassella</i>                    |                                                                 | Rhs_core_8               |
| Rhs_tox_150         |                    |                  |                | 2             |                                         | <i>Snodgrassella</i>                                            |                          |
| Rhs_tox_151         | Doc                | COG3654          | 0.00062        | 6             | <i>Snodgrassella</i>                    | <i>Snodgrassella</i>                                            | Rhs_core_8               |
| Rhs_tox_152         |                    |                  |                | 16            | <i>Snodgrassella</i>                    | <i>Snodgrassella</i>                                            | Rhs_core_8               |
| Rhs_tox_153         |                    |                  |                | 3             | <i>Snodgrassella</i>                    | <i>Snodgrassella</i>                                            | Rhs_core_8               |
| Rhs_tox_154         |                    |                  |                | 21            | <i>Snodgrassella</i>                    | <i>Snodgrassella</i><br><i>Gilliamella</i>                      | Rhs_core_8               |
| Rhs_tox_155         |                    |                  |                | 2             | <i>Snodgrassella</i>                    |                                                                 | Rhs_core_8               |
| Rhs_tox_156         |                    |                  |                | 7             | <i>Snodgrassella</i>                    | <i>Snodgrassella</i>                                            | Rhs_core_8               |
| Rhs_tox_157         |                    |                  |                | 2             | <i>Snodgrassella</i>                    | <i>Snodgrassella</i>                                            | Rhs_core_8               |
| Rhs_tox_158         |                    |                  |                | 10            |                                         | <i>Snodgrassella</i>                                            |                          |
| Rhs_tox_159         | MafB19-deam        | pfam14437        | 6.23E-10       | 13            | <i>Snodgrassella</i>                    | <i>Snodgrassella</i><br><i>Schmidhempellia</i>                  | Rhs_core_8               |
| Rhs_tox_160         | Gln_amidase        | pfam15644        | 3.04E-17       | 10            | <i>Snodgrassella</i>                    | <i>Snodgrassella</i><br><i>Gilliamella</i>                      | Rhs_core_8               |
| Rhs_tox_161         | LHH                | pfam14411        | 1.09E-21       | 19            | <i>Snodgrassella</i>                    | <i>Snodgrassella</i><br><i>Gilliamella</i>                      | Rhs_core_8               |
| Rhs_tox_162         |                    |                  |                | 5             |                                         | <i>Apibacter</i><br><i>Gilliamella</i>                          |                          |
| Rhs_tox_163         |                    |                  |                | 5             |                                         | <i>Apibacter</i><br><i>Gilliamella</i>                          |                          |
| Rhs_tox_164         |                    |                  |                | 27            |                                         | <i>Snodgrassella</i><br><i>Gilliamella</i><br><i>Frischella</i> | Rhs_core_7<br>Rhs_core_9 |

**Table S1 continued**

| Toxin domain | CDD top hit      | Accession | E-value  | Copies | Genus (full length)  | Genus (fragment)                                                | Rhs core domains          |
|--------------|------------------|-----------|----------|--------|----------------------|-----------------------------------------------------------------|---------------------------|
| Rhs_tox_165  | PBECR1           | pfam18809 | 0.008097 | 11     |                      | <i>Snodgrassella</i><br><i>Gilliamella</i><br><i>Frischella</i> |                           |
| Rhs_tox_166  |                  |           |          | 16     |                      | <i>Snodgrassella</i><br><i>Gilliamella</i><br><i>Frischella</i> | Rhs_core_7                |
| Rhs_tox_167  | AHH              | pfam14412 | 1.32E-19 | 5      |                      | <i>Gilliamella</i><br><i>Frischella</i>                         | Rhs_core_9                |
| Rhs_tox_168  |                  |           |          | 2      |                      | <i>Gilliamella</i>                                              |                           |
| Rhs_tox_169  |                  |           |          | 6      |                      | <i>Gilliamella</i>                                              |                           |
| Rhs_tox_170  |                  |           |          | 7      | <i>Gilliamella</i>   | <i>Gilliamella</i>                                              | Rhs_core_9                |
| Rhs_tox_171  | Tox-HNH-EHHH     | pfam15657 | 1.99E-15 | 3      |                      | <i>Snodgrassella</i><br><i>Gilliamella</i>                      |                           |
| Rhs_tox_172  |                  |           |          | 2      |                      | <i>Gilliamella</i>                                              | Rhs_core_9                |
| Rhs_tox_173  |                  |           |          | 1      |                      | <i>Gilliamella</i>                                              | Rhs_core_9                |
| Rhs_tox_174  | barnase          | cd00933   | 3.15E-28 | 3      | <i>Gilliamella</i>   | <i>Gilliamella</i>                                              |                           |
| Rhs_tox_175  | Ntox8            | pfam15545 | 3.34E-17 | 1      |                      | <i>Apibacter</i>                                                |                           |
| Rhs_tox_176  |                  |           |          | 31     |                      | <i>Snodgrassella</i><br><i>Gilliamella</i>                      | Rhs_core_6                |
| Rhs_tox_177  | Tox-HNH-EHHH     | pfam15657 | 0.002963 | 10     | <i>Apibacter</i>     | <i>Snodgrassella</i><br><i>Gilliamella</i>                      | Rhs_core_10               |
| Rhs_tox_178  | AHH              | pfam14412 | 0.000653 | 6      |                      | <i>Gilliamella</i>                                              |                           |
| Rhs_tox_179  |                  |           |          | 3      |                      | <i>Gilliamella</i>                                              |                           |
| Rhs_tox_180  | GIY-YIG_UvrC_Cho | cd10434   | 1.52E-05 | 1      |                      | <i>Gilliamella</i>                                              |                           |
| Rhs_tox_181  |                  |           |          | 3      |                      | <i>Gilliamella</i>                                              |                           |
| Rhs_tox_182  | AHH              | pfam14412 | 1.58E-10 | 3      |                      | <i>Gilliamella</i>                                              |                           |
| Rhs_tox_183  | LHH              | pfam14411 | 4.29E-17 | 3      |                      | <i>Gilliamella</i>                                              |                           |
| Rhs_tox_184  |                  |           |          | 6      |                      | <i>Gilliamella</i>                                              |                           |
| Rhs_tox_185  | WHH              | pfam14414 | 2.70E-06 | 10     | <i>Snodgrassella</i> | <i>Snodgrassella</i><br><i>Gilliamella</i><br><i>Apibacter</i>  |                           |
| Rhs_tox_186  | Tox-HNH-EHHH     | pfam15657 | 2.53E-22 | 7      | <i>Snodgrassella</i> | <i>Gilliamella</i>                                              | Rhs_core_6<br>Rhs_core_10 |
| Rhs_tox_187  |                  |           |          | 3      |                      | <i>Gilliamella</i>                                              | Rhs_core_10               |
| Rhs_tox_188  |                  |           |          | 21     | <i>Snodgrassella</i> | <i>Snodgrassella</i><br><i>Gilliamella</i>                      | Rhs_core_6<br>Rhs_core_10 |
| Rhs_tox_189  |                  |           |          | 11     | <i>Snodgrassella</i> | <i>Snodgrassella</i>                                            | Rhs_core_8                |
| Rhs_tox_190  |                  |           |          | 6      | <i>Snodgrassella</i> |                                                                 | Rhs_core_11               |
| Rhs_tox_191  |                  |           |          | 3      |                      | <i>Apibacter</i>                                                |                           |
| Rhs_tox_192  |                  |           |          | 1      |                      | <i>Apibacter</i>                                                |                           |
| Rhs_tox_193  | Lipase_3         | cd00519   | 0.00084  | 1      |                      | <i>Apibacter</i>                                                |                           |
| Rhs_tox_194  |                  |           |          | 1      |                      | <i>Apibacter</i>                                                |                           |
| Rhs_tox_195  |                  |           |          | 1      |                      | <i>Apibacter</i>                                                |                           |
| Rhs_tox_196  |                  |           |          | 14     | <i>Apibacter</i>     | <i>Apibacter</i>                                                | Rhs_core_12               |
| Rhs_tox_197  |                  |           |          | 8      |                      | <i>Apibacter</i>                                                |                           |

**Table S1 continued**

| <b>Toxin domain</b> | <b>CDD top hit</b> | <b>Accession</b> | <b>E-value</b> | <b>Copies</b> | <b>Genus (full length)</b> | <b>Genus (fragment)</b> | <b>Rhs core domains</b> |
|---------------------|--------------------|------------------|----------------|---------------|----------------------------|-------------------------|-------------------------|
| Rhs_tox_198         |                    |                  |                | 3             |                            | <i>Apibacter</i>        |                         |
| Rhs_tox_199         |                    |                  |                | 4             |                            | <i>Apibacter</i>        |                         |
| Rhs_tox_200         |                    |                  |                | 4             |                            | <i>Apibacter</i>        |                         |
| Rhs_tox_201         |                    |                  |                | 6             |                            | <i>Apibacter</i>        |                         |
| Rhs_tox_202         |                    |                  |                | 8             |                            | <i>Apibacter</i>        | Rhs_core_2              |
| Rhs_tox_203         |                    |                  |                | 6             | <i>Apibacter</i>           | <i>Snodgrassella</i>    | Rhs_core_2              |
| Rhs_tox_204         |                    |                  |                | 1             | <i>Apibacter</i>           |                         | Rhs_core_2              |
| Rhs_tox_205         |                    |                  |                | 11            | <i>Apibacter</i>           | <i>Apibacter</i>        | Rhs_core_2              |
| Rhs_tox_206         |                    |                  |                | 4             | <i>Apibacter</i>           |                         | Rhs_core_2              |
| Rhs_tox_207         |                    |                  |                | 6             |                            | <i>Apibacter</i>        | Rhs_core_2              |
| Rhs_tox_208         |                    |                  |                | 6             |                            | <i>Apibacter</i>        | Rhs_core_2              |
