# Supplementary material for: Evolution of Interbacterial Antagonism in Bee Gut Microbiota Reflects Host and Symbiont Diversification
Source: PubMed Central journal article supplement (PMC8125069; doi:10.1128/msystems.00063-21), 2021-05-11
Supplement: mSystems.00063-21-st002.pdf [file mSystems.00063-21-st002.pdf]

**Table S2.** Proteins used in TssB, TssC, and TssH phylogenies.

| Class                 | Species                                                            | T6SS subfamily | TssB           | TssC           | TssH           |
|-----------------------|--------------------------------------------------------------------|----------------|----------------|----------------|----------------|
| Alphaproteobacteria   | <i>Rhizobacterium leguminosarum</i>                                | i3             | WP 168301612.1 | WP 130767081.1 | WP 130698940.1 |
| Alphaproteobacteria   | <i>Agrobacterium tumefaciens</i>                                   | i5             | WP 042619947.1 | WP 060724235.1 | WP 137005461.1 |
| Alphaproteobacteria   | <i>Acidiphilium</i>                                                | i5             | WP 029312514.1 | WP 029312513.1 | WP 029312510.1 |
| Alphaproteobacteria   | <i>Acetobacter thailandicus</i>                                    | i5             | NHN93965.1     | NHN93966.1     | NHN93963.1     |
| Alphaproteobacteria   | <i>Roseomonas stagni</i>                                           | i5             | WP 092958817.1 | WP 092958819.1 | WP 092958814.1 |
| Alphaproteobacteria   | <i>Inquilinus limosus</i>                                          | i5             | WP 034848252.1 | WP 088155147.1 | WP 088155175.1 |
|                       |                                                                    |                | WP 088155151.1 | WP 088155149.1 | WP 088157277.1 |
|                       |                                                                    |                |                | WP 088157287.1 |                |
|                       |                                                                    |                |                | WP 088157289.1 |                |
| Betaproteobacteria    | <i>Snodgrassella alvi</i> wkB298                                   | i3             | WP 100141422.1 | WP 100141421.1 | WP 100152754.1 |
| Betaproteobacteria    | <i>Snodgrassella alvi</i> HK3                                      | i3             | WP 100099139.1 | WP 100099140.1 | WP 100123967.1 |
|                       |                                                                    | i2             | WP 100123960.1 | WP 100123961.1 | WP 100124084.1 |
| Betaproteobacteria    | <i>Snodgrassella alvi</i> wkB2                                     | i3             | WP 025329757.1 | WP 025329758.1 | WP 025329756.1 |
|                       |                                                                    | i2             | WP 025330951.1 | WP 038648915.1 | WP 025330944.1 |
| Betaproteobacteria    | <i>Burkholderia thailandensis</i> E264                             | i1, i3, i4b    | WP 009888592.1 | WP 009888594.1 | WP 009893771.1 |
|                       |                                                                    |                | WP 009894728.1 | WP 009894729.1 | WP 009895032.1 |
|                       |                                                                    |                | WP 009895017.1 | WP 009895019.1 | WP 009896189.1 |
|                       |                                                                    |                | WP 009896198.1 | WP 043037857.1 | WP 009907099.1 |
|                       |                                                                    |                | WP 009901015.1 | WP 009901014.1 | WP 009910486.1 |
| Betaproteobacteria    | <i>Neisseria mucosa</i>                                            | i2             | WP 003760099.1 | WP 060975453.1 | WP 060975457.1 |
| Betaproteobacteria    | <i>Amantichitinum ursilacus</i>                                    | i2, i4a        | WP 053938100.1 | WP 053938099.1 | WP 053938104.1 |
|                       |                                                                    |                | WP 053939065.1 | WP 053939066.1 | WP 053939056.1 |
| Betaproteobacteria    | <i>Cupriavidus basilensis</i>                                      | i2, i3         | WP 043344071.1 | WP 043344074.1 | WP 043344068.1 |
|                       |                                                                    |                | WP 043353035.1 | WP 043353033.1 | WP 043353022.1 |
| Betaproteobacteria    | <i>Burkholderia agricolaris</i>                                    | i1, i2, i4b    | WP 153135049.1 | WP 153135050.1 | WP 153135055.1 |
|                       |                                                                    |                | WP 153139628.1 | WP 153139630.1 | WP 153140969.1 |
|                       |                                                                    |                | WP 153140974.1 | WP 153140973.1 |                |
| Betaproteobacteria    | <i>Burkholderia hayleyella</i>                                     | i1, i3         | WP 153101208.1 | WP 153101210.1 | WP 153101206.1 |
|                       |                                                                    |                | WP 153102337.1 | WP 153102336.1 | WP 153102338.1 |
| Betaproteobacteria    | <i>Burkholderia bonniea</i>                                        | i1, i2         | WP 153074100.1 | WP 153074099.1 |                |
|                       |                                                                    |                | WP 153075580.1 | WP 153075579.1 |                |
| Betaproteobacteria    | <i>Bordetella avium</i>                                            | i4a            | WP 119647618.1 | WP 119647619.1 | WP 119536710.1 |
| Betaproteobacteria    | <i>Cupriavidus taiwanensis</i>                                     | i3             | WP 115679530.1 | WP 115679531.1 | WP 115679529.1 |
| Deltaproteobacteria   | <i>Geobacter</i> sp. M21                                           | i4a            | WP 015836522.1 | WP 015836523.1 | WP 012774279.1 |
| Epsilonproteobacteria | <i>Campylobacter jejuni</i>                                        | i1             | WP 087700196.1 | WP 126265123.1 |                |
| Gammaproteobacteria   | <i>Salmonella enterica</i> subsp. enterica serovar Typhimurium LT2 | i3             | NP 459270.1    | NP 459271.1    | NP 459269.1    |
| Gammaproteobacteria   | <i>Enterobacter cloacae</i>                                        | i3             | WP 047024474.1 | WP 063861990.1 | WP 063866598.1 |
| Gammaproteobacteria   | <i>Cronobacter sakazakii</i>                                       | i2, i3         | WP 007849582.1 | WP 004385964.1 | WP 007889015.1 |
|                       |                                                                    |                | WP 007853510.1 | WP 085958991.1 |                |
| Gammaproteobacteria   | <i>Pantoea alhagi</i> LTYR-11Z                                     | i3             | WP 085068116.1 | WP 085068115.1 | WP 085068100.1 |
|                       |                                                                    |                | WP 085069784.1 | WP 085069786.1 | WP 085069774.1 |
| Gammaproteobacteria   | <i>Serratia marcescens</i> kz11                                    | i3             | WP 015378282.1 | WP 004934958.1 | WP 103687201.1 |
|                       |                                                                    |                | WP 004935376.1 | WP 004935371.1 | WP 103687226.1 |
| Gammaproteobacteria   | <i>Pseudomonas aeruginosa</i> PAO1                                 | i1, i3, i4a    | NP 248773.1    | NP 250349.1    | NP 248780.1    |
|                       |                                                                    |                | NP 251055.1    | NP 248774.1    | NP 250353.1    |
|                       |                                                                    |                |                |                | NP 251061.1    |
| Gammaproteobacteria   | <i>Gilliamella apicola</i> wkB1                                    | i2             | WP 025316042.1 | WP 025316041.1 | WP 025316036.1 |
| Gammaproteobacteria   | <i>Gilliamella</i> sp. A7                                          | i2             | WP 086363296.1 | WP 086363295.1 | WP 086363290.1 |
| Gammaproteobacteria   | <i>Gilliamella</i> sp. wkB308                                      | i2             | WP 065559521.1 | WP 065559520.1 | WP 065559515.1 |
| Gammaproteobacteria   | <i>Frischella perrara</i> PEB0191                                  | i1, i2         | WP 039105357.1 | WP 039105358.1 | WP 039105368.1 |
|                       |                                                                    |                | WP 039105671.1 | WP 039105670.1 | WP 082018306.1 |
| Gammaproteobacteria   | <i>Candidatus "Schmidhempelia bombi"</i>                           | i2             | WP 024496317.1 | WP 024496316.1 | WP 024496311.1 |
| Gammaproteobacteria   | <i>Pragia fontium</i>                                              | i1, i2         | WP 047780369.1 | WP 047780368.1 | WP 047780362.1 |
|                       |                                                                    |                | WP 047780835.1 | WP 047780836.1 | WP 082118954.1 |
| Gammaproteobacteria   | <i>Pseudoalteromonas luteoviolacea</i>                             | i2             | WP 039610623.1 | WP 039610624.1 | WP 046357733.1 |
| Gammaproteobacteria   | <i>Escherichia coli</i> O157:H7 EDL933                             | i1             | WP 000037399.1 | WP 000056994.1 | WP 000614374.1 |

**Table S2 continued**

| Class               | Species                                   | T6SS subfamily | TssB           | TssC           | TssH           |
|---------------------|-------------------------------------------|----------------|----------------|----------------|----------------|
| Gammaproteobacteria | <i>Aliivibrio fischeri</i> FQ-A001        | i1             | WP 005418723.1 | WP 011261636.1 | WP 133415340.1 |
|                     |                                           |                | WP 012535409.1 | WP 063645634.1 | WP 133416029.1 |
| Gammaproteobacteria | <i>Vibrio cholerae</i> 10432-62           | i1             | WP 000031391.1 | WP 032469832.1 | WP 032469833.1 |
| Gammaproteobacteria | <i>Aeromonas hydrophila</i>               | i1             | WP 130632564.1 | WP 139389892.1 | WP 168234847.1 |
| Gammaproteobacteria | <i>Dickeya dadantii</i> DSM 18020         | i1             | WP 013317138.1 | WP 013317139.1 | WP 038910671.1 |
| Gammaproteobacteria | <i>Shewanella psychrophila</i> WP2        | i1             | WP 077751561.1 | WP 077751560.1 | WP 077751552.1 |
| Gammaproteobacteria | <i>Acinetobacter baumannii</i> ATCC 19606 | i4b            | WP 001119042.1 | WP 001066523.1 | WP 100223335.1 |
| Gammaproteobacteria | <i>Pseudomonas putida</i> 1290            | i1, i3         | WP 050703367.1 | WP 136913317.1 | WP 136913314.1 |
|                     |                                           |                | WP 136914036.1 | WP 136914035.1 |                |
| Gammaproteobacteria | <i>Pseudomonas putida</i> KT2440          | i4a            | AAN68708.1     | AAN68231.1     | AAN68703.1     |
| Gammaproteobacteria | <i>Edwardsiella anguillarum</i>           | i2, i4a        | WP 034166143.1 | WP 034162666.1 | WP 081926387.1 |
|                     |                                           |                | WP 045424188.1 | WP 038631670.1 | WP 051905104.1 |
| Gammaproteobacteria | <i>Acinetobacter baylyi</i>               | i4b            | WP 004929014.1 | WP 120430446.1 | WP 120430447.1 |
| Gammaproteobacteria | <i>Salmonella bongori</i>                 | i1, i4a        | HAB1658684.1   | HAB1658685.1   | HAB1658690.1   |
|                     |                                           |                | HAB1661735.1   | HAB1661734.1   | HAB1661726.1   |
| Gammaproteobacteria | <i>Gilliamella</i> sp. Choc5-1            | i1             | OCG49108.1     | OCG49107.1     | OCG49100.1     |
| Gammaproteobacteria | <i>Gilliamella</i> sp. ESL0182            | i1             | WP 110432959.1 | WP 110432960.1 | WP 110432968.1 |
| Gammaproteobacteria | <i>Frischella perrara</i> ESL0167         | i1             | WP 110444015.1 | WP 110444016.1 | WP 110444024.1 |
| Flavobacteriia      | <i>Apibacter adventoris</i> wkB180        | iii            | WP 105193632.1 | WP 105193635.1 | WP 105193633.1 |
| Flavobacteriia      | <i>Apibacter muscae</i>                   | iii            | WP 146262280.1 | WP 146262279.1 | WP 146310390.1 |
| Flavobacteriia      | <i>Apibacter mensalis</i>                 | iii            | WP 055426258.1 | WP 141656254.1 | WP 055426257.1 |
| Flavobacteriia      | <i>Flavobacterium johnsoniae</i> DSM 2064 | iii            | ABQ06283.1     | ABQ06282.1     | ABQ06297.1     |
| Flavobacteriia      | <i>Chryseobacterium aquaticum</i>         | iii            | WP 082171026.1 | WP 056017893.1 | WP 056017858.1 |
|                     |                                           |                | WP 056017271.1 | WP 056017274.1 | WP 056016891.1 |
| Bacteroidia         | <i>Bacteroides fragilis</i> 638R          | iii            | CBW22515.1     | CBW22514.1     | CBW22513.1     |
| Bacteroidia         | <i>Bacteroides caccae</i> CL03T12C61      | iii            | EIY16150.1     | EIY16149.1     | EIY16154.1     |
| Bacteroidia         | <i>Bacteroides uniformis</i> CL03T00C23   | iii            | EIY72195.1     | EIY72196.1     | EIY72192.1     |
