# Supplementary material for: Evolution of Interbacterial Antagonism in Bee Gut Microbiota Reflects Host and Symbiont Diversification
Source: PubMed Central journal article supplement (PMC8125069; doi:10.1128/msystems.00063-21), 2021-05-11
Supplement: mSystems.00063-21-st003.pdf [file mSystems.00063-21-st003.pdf]

**Table S3.** Bee gut isolate genomes analyzed in this study.

| Assembly accession | Strain  | Species                                | Host species             | Location       |
|--------------------|---------|----------------------------------------|--------------------------|----------------|
| GCF_002964965.1    | wkB180  | <i>Apibacter adventoris</i>            | <i>Apis dorsata</i>      | Southeast Asia |
| GCF_002964975.1    | wkB301  | <i>Apibacter adventoris</i>            | <i>Apis dorsata</i>      | Southeast Asia |
| GCF_001418685.1    | R-53146 | <i>Apibacter mensalis</i>              | <i>Bombus lapidarius</i> | Europe         |
| GCF_009827835.1    | B2912   | <i>Apibacter</i> sp.                   | <i>Apis cerana</i>       | China          |
| GCF_009828155.1    | B3239   | <i>Apibacter</i> sp.                   | <i>Apis cerana</i>       | China          |
| GCF_009827885.1    | B3546   | <i>Apibacter</i> sp.                   | <i>Apis cerana</i>       | China          |
| GCF_009827845.1    | B3813   | <i>Apibacter</i> sp.                   | <i>Apis cerana</i>       | China          |
| GCF_009827855.1    | B3883   | <i>Apibacter</i> sp.                   | <i>Apis cerana</i>       | China          |
| GCF_009828165.1    | B3887   | <i>Apibacter</i> sp.                   | <i>Apis cerana</i>       | China          |
| GCF_009827795.1    | B3889   | <i>Apibacter</i> sp.                   | <i>Apis cerana</i>       | China          |
| GCF_009827805.1    | B3912   | <i>Apibacter</i> sp.                   | <i>Apis cerana</i>       | China          |
| GCF_009827735.1    | B3913   | <i>Apibacter</i> sp.                   | <i>Apis cerana</i>       | China          |
| GCF_009827755.1    | B3918   | <i>Apibacter</i> sp.                   | <i>Apis cerana</i>       | China          |
| GCF_009827745.1    | B3924   | <i>Apibacter</i> sp.                   | <i>Apis cerana</i>       | China          |
| GCF_009827705.1    | B3935   | <i>Apibacter</i> sp.                   | <i>Apis cerana</i>       | China          |
| GCF_002964915.1    | wkB309  | <i>Apibacter</i> sp.                   | <i>Apis cerana</i>       | Southeast Asia |
| GCF_002007565.1    | BBC0122 | <i>Bartonella apis</i>                 | <i>Apis mellifera</i>    | Europe         |
| GCF_002007485.1    | BBC0178 | <i>Bartonella apis</i>                 | <i>Apis mellifera</i>    | Europe         |
| GCF_002007505.1    | BBC0244 | <i>Bartonella apis</i>                 | <i>Apis mellifera</i>    | Europe         |
| GCF_001952075.1    | PEB0122 | <i>Bartonella apis</i>                 | <i>Apis mellifera</i>    | North America  |
| GCF_001952065.1    | PEB0149 | <i>Bartonella apis</i>                 | <i>Apis mellifera</i>    | North America  |
| GCF_001952045.1    | PEB0150 | <i>Bartonella apis</i>                 | <i>Apis mellifera</i>    | North America  |
| GCF_000471645.3    | Bimp    | <i>Candidatus Schmidhempelia bombi</i> | <i>Bombus impatiens</i>  | North America  |
| GCF_003202705.1    | ESL0167 | <i>Frischella perrara</i>              | <i>Apis mellifera</i>    | Europe         |
| GCF_000807275.1    | PEB0191 | <i>Frischella perrara</i>              | <i>Apis mellifera</i>    | North America  |
| GCF_002141515.1    | A-1-24  | <i>Gilliamella apicola</i>             | <i>Apis mellifera</i>    | North America  |
| GCF_002141675.1    | A-12-12 | <i>Gilliamella apicola</i>             | <i>Apis mellifera</i>    | North America  |
| GCF_002141565.1    | A-2-24  | <i>Gilliamella apicola</i>             | <i>Apis mellifera</i>    | North America  |
| GCF_002141655.1    | A-7-12  | <i>Gilliamella apicola</i>             | <i>Apis mellifera</i>    | North America  |
| GCF_002141665.1    | A-7-24  | <i>Gilliamella apicola</i>             | <i>Apis mellifera</i>    | North America  |
| GCF_002141715.1    | A-8-12  | <i>Gilliamella apicola</i>             | <i>Apis mellifera</i>    | North America  |
| GCF_002141745.1    | A-9-12  | <i>Gilliamella apicola</i>             | <i>Apis mellifera</i>    | North America  |
| GCF_002141555.1    | A8      | <i>Gilliamella apicola</i>             | <i>Apis mellifera</i>    | North America  |
| GCF_002141735.1    | A9      | <i>Gilliamella apicola</i>             | <i>Apis mellifera</i>    | North America  |
| GCF_002141905.1    | AM4     | <i>Gilliamella apicola</i>             | <i>Apis mellifera</i>    | North America  |
| GCF_002141575.1    | AM6     | <i>Gilliamella apicola</i>             | <i>Apis mellifera</i>    | North America  |
| GCF_002141595.1    | Aw-17   | <i>Gilliamella apicola</i>             | <i>Apis mellifera</i>    | North America  |
| GCF_002141815.1    | AW11    | <i>Gilliamella apicola</i>             | <i>Apis mellifera</i>    | North America  |
| GCF_002141755.1    | AW13    | <i>Gilliamella apicola</i>             | <i>Apis mellifera</i>    | North America  |
| GCF_003202815.1    | ESL0178 | <i>Gilliamella apicola</i>             | <i>Apis mellifera</i>    | Europe         |
| GCF_002088825.1    | N-12-12 | <i>Gilliamella apicola</i>             | <i>Apis mellifera</i>    | Europe         |
| GCF_002088905.1    | N-15-12 | <i>Gilliamella apicola</i>             | <i>Apis mellifera</i>    | Europe         |
| GCF_002142285.1    | N-22    | <i>Gilliamella apicola</i>             | <i>Apis mellifera</i>    | Europe         |
| GCF_002142345.1    | N-28    | <i>Gilliamella apicola</i>             | <i>Apis mellifera</i>    | Europe         |
| GCF_002088895.1    | N-9-4   | <i>Gilliamella apicola</i>             | <i>Apis mellifera</i>    | Europe         |
| GCF_002142265.1    | N-G5    | <i>Gilliamella apicola</i>             | <i>Apis mellifera</i>    | Europe         |
| GCF_002141785.1    | N10     | <i>Gilliamella apicola</i>             | <i>Apis mellifera</i>    | Europe         |
| GCF_002141855.1    | N2      | <i>Gilliamella apicola</i>             | <i>Apis mellifera</i>    | Europe         |
| GCF_002141635.1    | N4      | <i>Gilliamella apicola</i>             | <i>Apis mellifera</i>    | Europe         |
| GCF_002141885.1    | N6      | <i>Gilliamella apicola</i>             | <i>Apis mellifera</i>    | Europe         |
| GCF_002088845.1    | NO10    | <i>Gilliamella apicola</i>             | <i>Apis mellifera</i>    | Europe         |
| GCF_002088855.1    | NO5     | <i>Gilliamella apicola</i>             | <i>Apis mellifera</i>    | Europe         |
| GCF_002088795.1    | NO6     | <i>Gilliamella apicola</i>             | <i>Apis mellifera</i>    | Europe         |
| GCF_002088815.1    | NO8     | <i>Gilliamella apicola</i>             | <i>Apis mellifera</i>    | Europe         |
| GCF_001690735.1    | PEB0154 | <i>Gilliamella apicola</i>             | <i>Apis mellifera</i>    | North America  |
| GCF_007559145.1    | W8127   | <i>Gilliamella apicola</i>             | <i>Apis mellifera</i>    | China          |
| GCF_007559165.1    | W8131   | <i>Gilliamella apicola</i>             | <i>Apis mellifera</i>    | China          |
| GCF_000599985.1    | wkB1    | <i>Gilliamella apicola</i>             | <i>Apis mellifera</i>    | North America  |
| GCF_001693435.1    | wkB7    | <i>Gilliamella apicola</i>             | <i>Apis mellifera</i>    | North America  |
| GCF_002141865.1    | A-4-12  | <i>Gilliamella apis</i>                | <i>Apis mellifera</i>    | North America  |
| GCF_002142035.1    | A-TSA1  | <i>Gilliamella apis</i>                | <i>Apis mellifera</i>    | North America  |
| GCF_002142055.1    | A-TSA2  | <i>Gilliamella apis</i>                | <i>Apis mellifera</i>    | North America  |
| GCF_002142065.1    | A-TSA3  | <i>Gilliamella apis</i>                | <i>Apis mellifera</i>    | North America  |
| GCF_002142135.1    | A-TSA4  | <i>Gilliamella apis</i>                | <i>Apis mellifera</i>    | North America  |
| GCF_002141825.1    | AM1     | <i>Gilliamella apis</i>                | <i>Apis mellifera</i>    | North America  |

**Table S3, continued**

| <b>Assembly accession</b> | <b>Strain</b> | <b>Species</b>               | <b>Host species</b>          | <b>Location</b> |
|---------------------------|---------------|------------------------------|------------------------------|-----------------|
| GCF_003202875.1           | ESL0169       | <i>Gilliamella apis</i>      | <i>Apis mellifera</i>        | Europe          |
| GCF_001690775.1           | M1-2G         | <i>Gilliamella apis</i>      | <i>Apis mellifera</i>        | North America   |
| GCF_002142185.1           | N-G1          | <i>Gilliamella apis</i>      | <i>Apis mellifera</i>        | Europe          |
| GCF_002142225.1           | N-G3          | <i>Gilliamella apis</i>      | <i>Apis mellifera</i>        | Europe          |
| GCF_002142255.1           | N-G4          | <i>Gilliamella apis</i>      | <i>Apis mellifera</i>        | Europe          |
| GCF_002141945.1           | NO1           | <i>Gilliamella apis</i>      | <i>Apis mellifera</i>        | Europe          |
| GCF_002142085.1           | NO12          | <i>Gilliamella apis</i>      | <i>Apis mellifera</i>        | Europe          |
| GCF_002141975.1           | NO13          | <i>Gilliamella apis</i>      | <i>Apis mellifera</i>        | Europe          |
| GCF_002142115.1           | NO14          | <i>Gilliamella apis</i>      | <i>Apis mellifera</i>        | Europe          |
| GCF_002141935.1           | NO15          | <i>Gilliamella apis</i>      | <i>Apis mellifera</i>        | Europe          |
| GCF_002141985.1           | NO16          | <i>Gilliamella apis</i>      | <i>Apis mellifera</i>        | Europe          |
| GCF_002142155.1           | NO3           | <i>Gilliamella apis</i>      | <i>Apis mellifera</i>        | Europe          |
| GCF_002142165.1           | NO4           | <i>Gilliamella apis</i>      | <i>Apis mellifera</i>        | Europe          |
| GCF_001690755.1           | PEB0162       | <i>Gilliamella apis</i>      | <i>Apis mellifera</i>        | North America   |
| GCF_001690175.1           | PEB0183       | <i>Gilliamella apis</i>      | <i>Apis mellifera</i>        | North America   |
| GCF_900103255.1           | G. bombi      | <i>Gilliamella bombi</i>     | <i>Bombus</i> sp.            | Europe          |
| GCF_900094945.1           | R-53248       | <i>Gilliamella bombicola</i> | <i>Bombus</i> sp.            | Europe          |
| GCF_900094935.1           | R-53144       | <i>Gilliamella intestini</i> | <i>Bombus</i> sp.            | Europe          |
| GCF_900103085.1           | G. mensalis   | <i>Gilliamella mensalis</i>  | <i>Bombus</i> sp.            | Europe          |
| GCF_002142015.1           | A7            | <i>Gilliamella</i> sp.       | <i>Apis mellifera</i>        | North America   |
| GCF_001690255.1           | App2-1        | <i>Gilliamella</i> sp.       | <i>Bombus appositus</i>      | North America   |
| GCF_001690495.1           | App4-10       | <i>Gilliamella</i> sp.       | <i>Bombus appositus</i>      | North America   |
| GCF_001690525.1           | App6-5        | <i>Gilliamella</i> sp.       | <i>Bombus appositus</i>      | North America   |
| GCF_001690535.1           | Bif1-4        | <i>Gilliamella</i> sp.       | <i>Bombus bifarius</i>       | North America   |
| GCF_001690835.1           | Bim1-2        | <i>Gilliamella</i> sp.       | <i>Bombus bimaculatus</i>    | North America   |
| GCF_001690575.1           | Bim3-2        | <i>Gilliamella</i> sp.       | <i>Bombus bimaculatus</i>    | North America   |
| GCF_001690585.1           | Choc3-5       | <i>Gilliamella</i> sp.       | <i>Bombus impatiens</i>      | North America   |
| GCF_001690355.1           | Choc4-2       | <i>Gilliamella</i> sp.       | <i>Bombus impatiens</i>      | North America   |
| GCF_001690595.1           | Choc5-1       | <i>Gilliamella</i> sp.       | <i>Bombus impatiens</i>      | North America   |
| GCF_001690385.1           | Choc6-1       | <i>Gilliamella</i> sp.       | <i>Bombus impatiens</i>      | North America   |
| GCF_003202775.1           | ESL0172       | <i>Gilliamella</i> sp.       | <i>Apis mellifera</i>        | Europe          |
| GCF_003202915.1           | ESL0177       | <i>Gilliamella</i> sp.       | <i>Apis mellifera</i>        | Europe          |
| GCF_003202655.1           | ESL0182       | <i>Gilliamella</i> sp.       | <i>Apis mellifera</i>        | Europe          |
| GCF_001690825.1           | Fer1-1        | <i>Gilliamella</i> sp.       | <i>Bombus fervidus</i>       | North America   |
| GCF_001690305.1           | Fer2-1        | <i>Gilliamella</i> sp.       | <i>Bombus fervidus</i>       | North America   |
| GCF_001690515.1           | Fer4-1        | <i>Gilliamella</i> sp.       | <i>Bombus fervidus</i>       | North America   |
| GCF_001690815.1           | GillExp13     | <i>Gilliamella</i> sp.       | <i>Bombus impatiens</i>      | North America   |
| GCF_001690335.1           | Gris1-4       | <i>Gilliamella</i> sp.       | <i>Bombus griseocollis</i>   | North America   |
| GCF_001690345.1           | Gris3-2       | <i>Gilliamella</i> sp.       | <i>Bombus griseocollis</i>   | North America   |
| GCF_001690265.1           | HK2           | <i>Gilliamella</i> sp.       | <i>Bombus pennsylvanicus</i> | North America   |
| GCF_001690795.1           | HK7           | <i>Gilliamella</i> sp.       | <i>Bombus pennsylvanicus</i> | North America   |
| GCF_001690415.1           | Imp1-1        | <i>Gilliamella</i> sp.       | <i>Bombus impatiens</i>      | North America   |
| GCF_001690425.1           | Imp1-6        | <i>Gilliamella</i> sp.       | <i>Bombus impatiens</i>      | North America   |
| GCF_009795895.1           | Lep-s21       | <i>Gilliamella</i> sp.       | <i>Bombus lepidus</i>        | China           |
| GCF_009795845.1           | Lep-s35       | <i>Gilliamella</i> sp.       | <i>Bombus lepidus</i>        | China           |
| GCF_009795905.1           | Lep-s5        | <i>Gilliamella</i> sp.       | <i>Bombus lepidus</i>        | China           |
| GCF_002142215.1           | N-G2          | <i>Gilliamella</i> sp.       | <i>Apis mellifera</i>        | Europe          |
| GCF_002142275.1           | N-W3          | <i>Gilliamella</i> sp.       | <i>Apis mellifera</i>        | Europe          |
| GCF_001690435.1           | Nev3-1        | <i>Gilliamella</i> sp.       | <i>Bombus nevadensis</i>     | North America   |
| GCF_001690895.1           | Nev5-1        | <i>Gilliamella</i> sp.       | <i>Bombus nevadensis</i>     | North America   |
| GCF_001690605.1           | Nev6-6        | <i>Gilliamella</i> sp.       | <i>Bombus nevadensis</i>     | North America   |
| GCF_001690655.1           | Occ3-1        | <i>Gilliamella</i> sp.       | <i>Bombus occidentalis</i>   | North America   |
| GCF_001690675.1           | Occ4-3        | <i>Gilliamella</i> sp.       | <i>Bombus occidentalis</i>   | North America   |
| GCF_009795885.1           | Pas-s25       | <i>Gilliamella</i> sp.       | <i>Bombus pascuorum</i>      | China           |
| GCF_009795865.1           | Pas-s27       | <i>Gilliamella</i> sp.       | <i>Bombus pascuorum</i>      | China           |
| GCF_009795795.1           | Pas-s95       | <i>Gilliamella</i> sp.       | <i>Bombus pascuorum</i>      | China           |
| GCF_009795805.1           | Pra-s52       | <i>Gilliamella</i> sp.       | <i>Bombus pratorum</i>       | China           |
| GCF_009795785.1           | Pra-s54       | <i>Gilliamella</i> sp.       | <i>Bombus pratorum</i>       | China           |
| GCF_009795755.1           | Pra-s60       | <i>Gilliamella</i> sp.       | <i>Bombus pratorum</i>       | China           |
| GCF_009795745.1           | Pra-s65       | <i>Gilliamella</i> sp.       | <i>Bombus pratorum</i>       | China           |
| GCF_001690275.1           | WF3-4         | <i>Gilliamella</i> sp.       | <i>Bombus pennsylvanicus</i> | North America   |
| GCF_001690195.1           | wkB108        | <i>Gilliamella</i> sp.       | <i>Apis dorsata</i>          | Southeast Asia  |
| GCF_000733115.1           | wkB11         | <i>Gilliamella</i> sp.       | <i>Bombus bimaculatus</i>    | North America   |
| GCF_001690685.1           | wkB112        | <i>Gilliamella</i> sp.       | <i>Apis dorsata</i>          | Southeast Asia  |
| GCF_001693755.1           | wkB171        | <i>Gilliamella</i> sp.       | <i>Apis adeniformis</i>      | Southeast Asia  |
| GCF_001690705.1           | wkB178        | <i>Gilliamella</i> sp.       | <i>Apis dorsata</i>          | Southeast Asia  |
| GCF_001690875.1           | wkB18         | <i>Gilliamella</i> sp.       | <i>Bombus vagans</i>         | North America   |
| GCF_001690445.1           | wkB195        | <i>Gilliamella</i> sp.       | <i>Apis cerana</i>           | Southeast Asia  |

**Table S3, continued**

| <b>Assembly accession</b> | <b>Strain</b> | <b>Species</b>                  | <b>Host species</b>            | <b>Location</b> |
|---------------------------|---------------|---------------------------------|--------------------------------|-----------------|
| GCF_001690235.1           | wkB292        | <i>Gilliamella</i> sp.          | <i>Apis cerana</i>             | Southeast Asia  |
| GCF_000695585.1           | wkB30         | <i>Gilliamella</i> sp.          | <i>Bombus vagans</i>           | North America   |
| GCF_001690185.1           | wkB308        | <i>Gilliamella</i> sp.          | <i>Apis cerana</i>             | Southeast Asia  |
| GCF_001693745.1           | wkB72         | <i>Gilliamella</i> sp.          | <i>Apis cerana</i>             | Southeast Asia  |
| GCF_002917995.1           | A29           | <i>Parasaccharibacter apium</i> | <i>Apis mellifera</i> (larvae) | North America   |
| GCF_002592045.1           | AS1           | <i>Parasaccharibacter apium</i> | <i>Apis mellifera</i> (larvae) | North America   |
| GCF_002917945.1           | B8            | <i>Parasaccharibacter apium</i> | <i>Apis mellifera</i> (larvae) | North America   |
| GCF_002917985.1           | C6            | <i>Parasaccharibacter apium</i> | <i>Apis mellifera</i> (larvae) | North America   |
| GCF_002079945.1           | G7_7_3c       | <i>Parasaccharibacter apium</i> | <i>Apis mellifera</i> (larvae) | North America   |
| GCF_002088735.1           | A-1-12        | <i>Snodgrassella alvi</i>       | <i>Apis mellifera</i>          | North America   |
| GCF_002088405.1           | A-10-12       | <i>Snodgrassella alvi</i>       | <i>Apis mellifera</i>          | North America   |
| GCF_002088695.1           | A-11-12       | <i>Snodgrassella alvi</i>       | <i>Apis mellifera</i>          | North America   |
| GCF_002088585.1           | A-2-12        | <i>Snodgrassella alvi</i>       | <i>Apis mellifera</i>          | North America   |
| GCF_002088465.1           | A-5-24        | <i>Snodgrassella alvi</i>       | <i>Apis mellifera</i>          | North America   |
| GCF_002088515.1           | A-9-24        | <i>Snodgrassella alvi</i>       | <i>Apis mellifera</i>          | North America   |
| GCF_002089015.1           | A11           | <i>Snodgrassella alvi</i>       | <i>Apis mellifera</i>          | North America   |
| GCF_002088675.1           | A12           | <i>Snodgrassella alvi</i>       | <i>Apis mellifera</i>          | North America   |
| GCF_002088395.1           | A2            | <i>Snodgrassella alvi</i>       | <i>Apis mellifera</i>          | North America   |
| GCF_002088455.1           | A3            | <i>Snodgrassella alvi</i>       | <i>Apis mellifera</i>          | North America   |
| GCF_002088475.1           | A5            | <i>Snodgrassella alvi</i>       | <i>Apis mellifera</i>          | North America   |
| GCF_002777315.1           | App2-2        | <i>Snodgrassella alvi</i>       | <i>Bombus appositus</i>        | North America   |
| GCF_002777425.1           | App4-8        | <i>Snodgrassella alvi</i>       | <i>Bombus appositus</i>        | North America   |
| GCF_002777465.1           | App6-4        | <i>Snodgrassella alvi</i>       | <i>Bombus appositus</i>        | North America   |
| GCF_002088415.1           | Aw-18         | <i>Snodgrassella alvi</i>       | <i>Apis mellifera</i>          | North America   |
| GCF_002019415.1           | Aw-20         | <i>Snodgrassella alvi</i>       | <i>Apis mellifera</i>          | North America   |
| GCF_002406645.1           | E1            | <i>Snodgrassella alvi</i>       | <i>Apis mellifera</i>          | North America   |
| GCF_003202885.1           | ESL0196       | <i>Snodgrassella alvi</i>       | <i>Apis mellifera</i>          | Europe          |
| GCF_002777415.1           | Fer1-2        | <i>Snodgrassella alvi</i>       | <i>Bombus fervidus</i>         | North America   |
| GCF_002777485.1           | Fer2-2        | <i>Snodgrassella alvi</i>       | <i>Bombus fervidus</i>         | North America   |
| GCF_002777495.1           | Fer4-2        | <i>Snodgrassella alvi</i>       | <i>Bombus fervidus</i>         | North America   |
| GCF_002777525.1           | Gris1-3       | <i>Snodgrassella alvi</i>       | <i>Bombus griseocollis</i>     | North America   |
| GCF_002777615.1           | Gris1-6       | <i>Snodgrassella alvi</i>       | <i>Bombus griseocollis</i>     | North America   |
| GCF_002777335.1           | Gris2-3-4     | <i>Snodgrassella alvi</i>       | <i>Bombus griseocollis</i>     | North America   |
| GCF_002777595.1           | Gris3-4       | <i>Snodgrassella alvi</i>       | <i>Bombus griseocollis</i>     | North America   |
| GCF_002777705.1           | HK3           | <i>Snodgrassella alvi</i>       | <i>Bombus pennsylvanicus</i>   | North America   |
| GCF_002777795.1           | HK9x          | <i>Snodgrassella alvi</i>       | <i>Bombus pennsylvanicus</i>   | North America   |
| GCF_002777925.1           | MS1-3         | <i>Snodgrassella alvi</i>       | <i>Apis mellifera</i>          | North America   |
| GCF_002088655.1           | N-23          | <i>Snodgrassella alvi</i>       | <i>Apis mellifera</i>          | Europe          |
| GCF_002088755.1           | N-S1          | <i>Snodgrassella alvi</i>       | <i>Apis mellifera</i>          | Europe          |
| GCF_002088595.1           | N-S2          | <i>Snodgrassella alvi</i>       | <i>Apis mellifera</i>          | Europe          |
| GCF_002088635.1           | N-S3          | <i>Snodgrassella alvi</i>       | <i>Apis mellifera</i>          | Europe          |
| GCF_002088665.1           | N-S4          | <i>Snodgrassella alvi</i>       | <i>Apis mellifera</i>          | Europe          |
| GCF_002088765.1           | N-S5          | <i>Snodgrassella alvi</i>       | <i>Apis mellifera</i>          | Europe          |
| GCF_002088525.1           | N-W4          | <i>Snodgrassella alvi</i>       | <i>Apis mellifera</i>          | Europe          |
| GCF_002088555.1           | N-W7          | <i>Snodgrassella alvi</i>       | <i>Apis mellifera</i>          | Europe          |
| GCF_002088575.1           | N9            | <i>Snodgrassella alvi</i>       | <i>Apis mellifera</i>          | Europe          |
| GCF_002777575.1           | Nev3CBA3      | <i>Snodgrassella alvi</i>       | <i>Bombus nevadensis</i>       | North America   |
| GCF_002777825.1           | Nev4-2        | <i>Snodgrassella alvi</i>       | <i>Bombus nevadensis</i>       | North America   |
| GCF_002777635.1           | Occ4-2        | <i>Snodgrassella alvi</i>       | <i>Bombus occidentalis</i>     | North America   |
| GCF_002777865.1           | PEB0171       | <i>Snodgrassella alvi</i>       | <i>Apis mellifera</i>          | North America   |
| GCF_002777875.1           | PEB0178       | <i>Snodgrassella alvi</i>       | <i>Apis mellifera</i>          | North America   |
| GCF_002777325.1           | Pens2-2-5     | <i>Snodgrassella alvi</i>       | <i>Bombus pennsylvanicus</i>   | North America   |
| GCF_900094895.1           | R-53583       | <i>Snodgrassella alvi</i>       | <i>Bombus</i> sp.              | Europe          |
| GCF_002777675.1           | Ruf1-X        | <i>Snodgrassella alvi</i>       | <i>Bombus rufocinctus</i>      | North America   |
| GCF_002777345.1           | Snod2-1-5     | <i>Snodgrassella alvi</i>       | <i>Bombus impatiens</i>        | North America   |
| GCF_002777745.1           | WF3-3         | <i>Snodgrassella alvi</i>       | <i>Bombus pennsylvanicus</i>   | North America   |
| GCF_000695565.1           | wkB12         | <i>Snodgrassella alvi</i>       | <i>Bombus bimaculatus</i>      | North America   |
| GCF_000600005.1           | wkB2          | <i>Snodgrassella alvi</i>       | <i>Apis mellifera</i>          | North America   |
| GCF_002777775.1           | wkB237        | <i>Snodgrassella alvi</i>       | <i>Apis andreniformis</i>      | Southeast Asia  |
| GCF_002777655.1           | wkB273        | <i>Snodgrassella alvi</i>       | <i>Apis florea</i>             | Southeast Asia  |
| GCF_000695545.1           | wkB29         | <i>Snodgrassella alvi</i>       | <i>Bombus vagans</i>           | North America   |
| GCF_002777855.1           | wkB298        | <i>Snodgrassella alvi</i>       | <i>Apis cerana</i>             | Southeast Asia  |
| GCF_002777695.1           | wkB332        | <i>Snodgrassella alvi</i>       | <i>Apis mellifera</i>          | Southeast Asia  |
| GCF_002777815.1           | wkB339        | <i>Snodgrassella alvi</i>       | <i>Apis mellifera</i>          | Southeast Asia  |
| GCF_002777735.1           | wkB9          | <i>Snodgrassella alvi</i>       | <i>Apis mellifera</i>          | North America   |
